# Supplementary material for: Combined mild chemical pretreatments for complete cadmium release and cellulosic ethanol co-production distinctive in wheat mutant straw
Source: Royal Society of Chemistry journal article supplement (doi:10.1039/c9gc00686a), 2019-01-01
Supplement: c9gc00686a1.pdf [file c9gc00686a1.pdf]

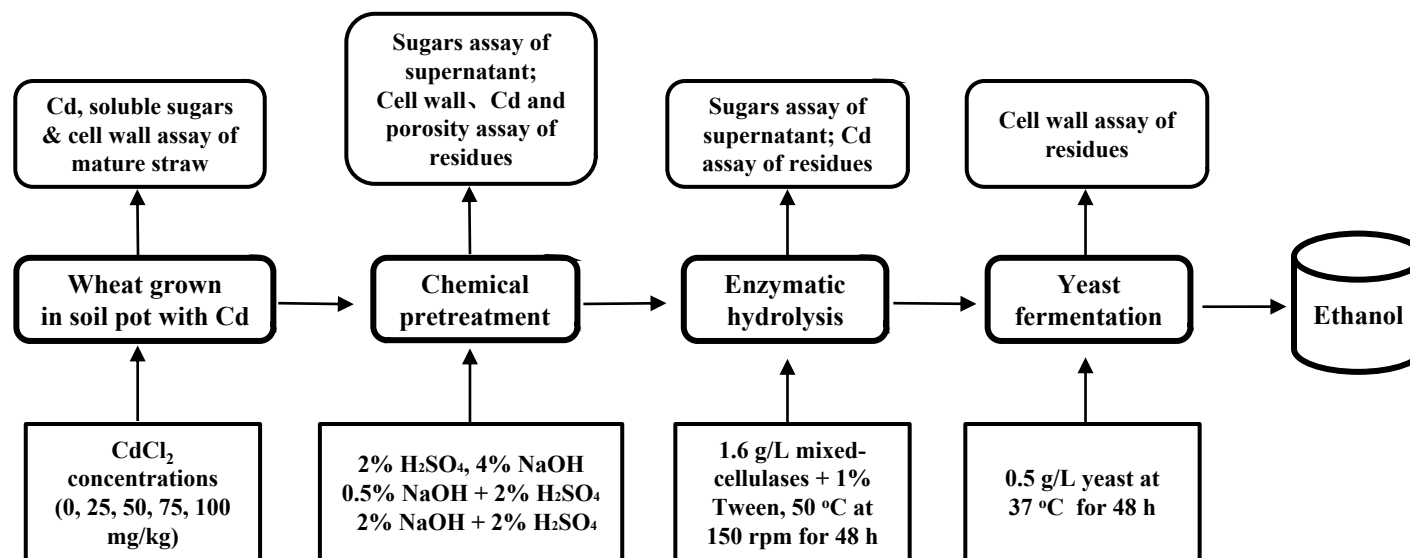

**Fig. S1** General experimental procedure of Cd release and bioethanol conversion

**Table S1** Cd content of wheat mutant and wild type grown in soil pots supplied with CdCl<sub>2</sub>

| Sample                                   | CdCl <sub>2</sub> supply in pot<br>(mg/kg soil) | Cd content of wheat (ug/g dry matter) <sup>#</sup> |                        |
|------------------------------------------|-------------------------------------------------|----------------------------------------------------|------------------------|
|                                          |                                                 | Straw                                              | Seed                   |
| <b>Wild Type (WT)</b><br><b>(ZM9023)</b> | <b>0</b>                                        | 0.06±0.01 <sup>e</sup>                             | 0.03±0.01 <sup>e</sup> |
|                                          | <b>25</b>                                       | 4.25±0.12 <sup>c</sup>                             | 3.51±0.34 <sup>c</sup> |
|                                          | <b>50</b>                                       | 5.11±0.75 <sup>b</sup>                             | 4.19±0.39 <sup>b</sup> |
|                                          | <b>75</b>                                       | 6.43±0.56 <sup>a</sup>                             | 4.84±0.45 <sup>a</sup> |
|                                          | <b>100</b>                                      | 2.32±0.09 <sup>d</sup>                             | 2.20±0.02 <sup>d</sup> |
| <b>Mutant</b><br><b>(ZT5)</b>            | <b>0</b>                                        | 0.05±0.01 <sup>d</sup>                             | 0.02±0.00 <sup>d</sup> |
|                                          | <b>25</b>                                       | 4.63±0.80 <sup>c</sup>                             | 3.23±0.28 <sup>c</sup> |
|                                          | <b>50</b>                                       | 5.03±0.40 <sup>c</sup>                             | 4.36±0.32 <sup>b</sup> |
|                                          | <b>75</b>                                       | 8.29±0.51 <sup>a</sup>                             | 4.99±0.39 <sup>a</sup> |
|                                          | <b>100</b>                                      | 6.59±0.90 <sup>b</sup>                             | 4.49±0.35 <sup>b</sup> |

<sup>#</sup> Data as means ± SD ( N = 3) with LSD-test for significant differences among all values marked as a, b, c, d, e, respectively.

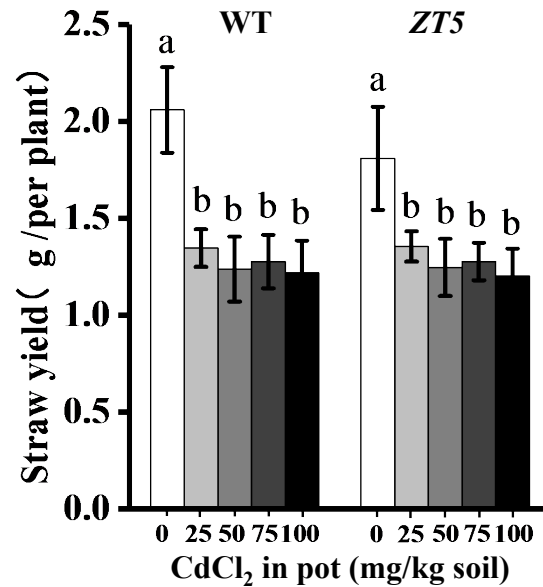

**Fig. S2** Dry weight (g/per plant) of mature straws in wheat mutant (*ZT5*) and wild type (WT/ZM9023) grown in soil pots supplied with different concentrations of CdCl<sub>2</sub>. Data as means  $\pm$  SD (N = 3), and letters (a, b, c, d, e) as mean values for significant difference each others by LSD-test, respectively.

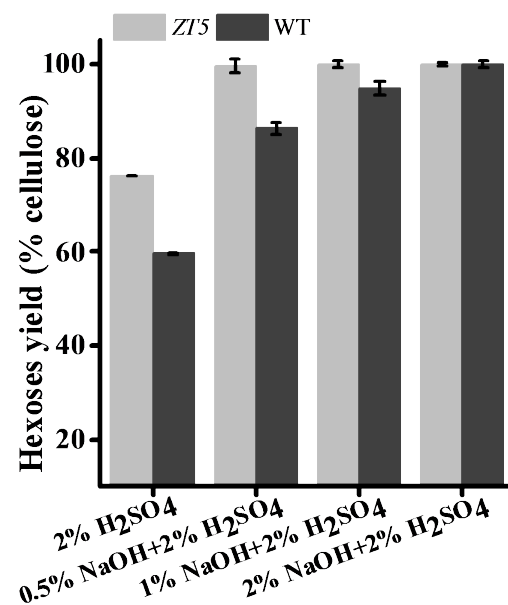

**Fig. S3** Hexoses yields in wheat mutant (ZT5) and WT. Hexoses yields (% cellulose) released from enzymatic hydrolysis after two-step pretreatment (NaOH + H<sub>2</sub>SO<sub>4</sub>) at a series of concentrations.

**Table S2** Hexoses yield (% cellulose) released from enzymatic hydrolysis after chemical pretreatments

| sample | CdCl <sub>2</sub> supply<br>(mg/kg soil) | 2% $\text{H}_2\text{SO}_4$ | 4%NaOH   | 0.5%NaOH+2% $\text{H}_2\text{SO}_4$ | 2%NaOH+2% $\text{H}_2\text{SO}_4$ |
|--------|------------------------------------------|----------------------------|----------|-------------------------------------|-----------------------------------|
| WT     | 0                                        | 63.99±1.47                 | 100±1.00 | 84.43±2.11                          | 100±2.58                          |
|        | 75                                       | 63.58±0.97                 | 100±1.83 | 86.91±0.71                          | 100±2.26                          |
| ZT5    | 0                                        | 81.05±2.83                 | 100±2.24 | 92.66±3.00                          | 100±1.95                          |
|        | 75                                       | 75.89±1.45                 | 100±3.11 | 91.33±2.31                          | 100±3.15                          |

Data as means ± SD (N = 3).

**Table S3** Total sugars (% dry matter) released from enzymatic hydrolysis after chemical pretreatments

| Sample | CdCl <sub>2</sub> supply<br>(mg/kg soil) | 2% $\text{H}_2\text{SO}_4$ | 4% $\text{NaOH}$ | 0.5% $\text{NaOH}$ +2% $\text{H}_2\text{SO}_4$ | 2% $\text{NaOH}$ +2% $\text{H}_2\text{SO}_4$ |
|--------|------------------------------------------|----------------------------|------------------|------------------------------------------------|----------------------------------------------|
| WT     | 0                                        | 26.44±0.57                 | 48.08±0.68       | 35.23±0.18                                     | 43.09±0.86                                   |
|        | 75                                       | 23.66±0.39                 | 45.64±0.82       | 33.75±0.18                                     | 40.86±1.20                                   |
| ZT5    | 0                                        | 23.61±0.82                 | 36.64±1.40       | 27.21±0.85                                     | 30.71±0.62                                   |
|        | 75                                       | 21.25±0.40                 | 35.60±0.99       | 25.84±0.34                                     | 30.05±0.97                                   |

Data as means ± SD (N = 3).

**Table S4** Bioethanol yield (% dry matter) from yeast fermentation using total hexoses from enzymatic hydrolyses of soluble sugars and pretreated biomass residues

| sample | CdCl <sub>2</sub> supply<br>(mg/kg soil) | 2%H <sub>2</sub> SO <sub>4</sub> | 4%NaOH     | 0.5%NaOH+2%H <sub>2</sub> SO <sub>4</sub> | 2%NaOH+2%H <sub>2</sub> SO <sub>4</sub> |
|--------|------------------------------------------|----------------------------------|------------|-------------------------------------------|-----------------------------------------|
| WT     | 0                                        | 10.19±0.46                       | 14.46±0.11 | 13.34±0.41**                              | 15.15±0.19                              |
|        | 75                                       | 11.90±0.50                       | 15.43±0.10 | 14.52±0.11**                              | 15.75±0.19                              |
| ZT5    | 0                                        | 9.52±0.30                        | 11.24±0.20 | 11.17±0.11**                              | 11.63±0.19                              |
|        | 75                                       | 11.04±0.19                       | 12.22±0.20 | 11.83±0.19**                              | 12.29±0.31                              |

Data as means ± SD (N = 3). \*\* As significant difference between 0.5%NaOH + 2%H<sub>2</sub>SO<sub>4</sub> and 2%H<sub>2</sub>SO<sub>4</sub> by t-test at  $P < 0.01$ .

**Table S5** Monosaccharide composition of total soluble sugars (% of total) extracted from mature wheat straw

| Sample | CdCl <sub>2</sub> supply<br>(mg/kg soil) | Rha  | Fuc  | Ara   | Xyl   | Man  | Glc   | Gal  |
|--------|------------------------------------------|------|------|-------|-------|------|-------|------|
| WT     | 0                                        | 1.95 | 1.19 | 19.14 | 14.65 | 4.96 | 49.47 | 8.63 |
|        | 75                                       | 0.54 | 0.69 | 5.03  | 2.95  | 2.47 | 84.60 | 3.72 |
| ZT5    | 0                                        | 1.29 | 1.20 | 14.67 | 10.86 | 7.31 | 57.26 | 7.41 |
|        | 75                                       | 0.57 | 0.59 | 6.13  | 4.09  | 3.19 | 81.47 | 3.97 |



**Table S6** Cellulose features (DP, CrI) in wheat mutant and WT straws

| Cellulose features | CdCl <sub>2</sub> supply (mg/kg soil) | Sample | Raw material  | 0.5%NaOH+2%H <sub>2</sub> SO <sub>4</sub> |               |
|--------------------|---------------------------------------|--------|---------------|-------------------------------------------|---------------|
| DP                 | 0                                     | WT     | 1272±3.19     | 809±0.95                                  | <b>-36%**</b> |
|                    |                                       | ZT5    | 863±0.69      | 597±1.59                                  | <b>-31%**</b> |
|                    |                                       |        | <b>-32%**</b> | <b>-26%**</b>                             |               |
|                    | 75                                    | WT     | 972±1.56      | 756±1.63                                  | <b>-22%**</b> |
|                    |                                       | ZT5    | 794±0.00      | 606±0.90                                  | <b>-24%**</b> |
|                    |                                       |        | <b>-18%**</b> | <b>-20%**</b>                             |               |
| CrI                | 0                                     | WT     | 46.53         | 55.72                                     | <b>20%</b>    |
|                    |                                       | ZT5    | 36.19         | 47.84                                     | <b>32%</b>    |
|                    |                                       |        | <b>-22%</b>   | <b>-14%</b>                               |               |
|                    | 75                                    | WT     | 47.61         | 54.98                                     | <b>16%</b>    |
|                    |                                       | ZT5    | 37.21         | 49.55                                     | <b>33%</b>    |
|                    |                                       |        | <b>-22%</b>   | <b>-12%</b>                               |               |

Data as means ± SD (N = 3). \*\* As significant difference between two samples by t-test at  $P < 0.01$  (N = 3).

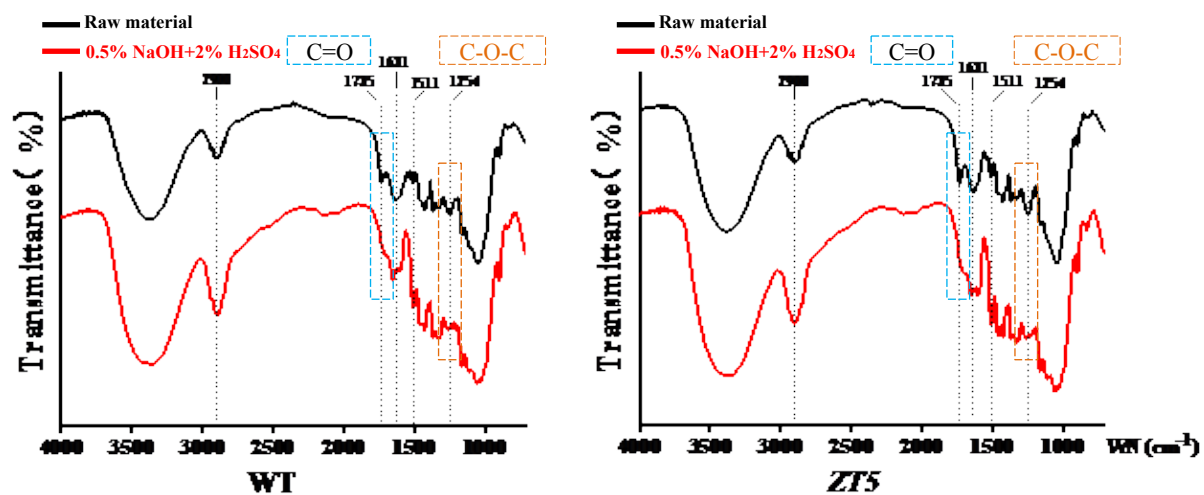

**Fig. S4** Fourier transform infrared spectroscopic profiling among the raw materials (black) and two-step pretreated residues (red) in wheat mutant and WT straws.

**Table S7** Characteristic peaks of the FTIR spectra in wheat biomass residues as referred from previous studies

| Reported<br>wave number<br>(cm <sup>-1</sup> ) | Observed<br>wave number<br>(cm <sup>-1</sup> ) | Functional group                               | Assignment              | Reference |
|------------------------------------------------|------------------------------------------------|------------------------------------------------|-------------------------|-----------|
| 898                                            | 898                                            | C—H vibration                                  | Cellulose               | 3         |
| 1051                                           | 1051                                           | C—O—C ring skeletal<br>vibration               | Hemicelluloses          | 3         |
| 1163                                           | 1164                                           | C—O—C asymmetric<br>stretching                 | Cellulose               | 2         |
| 1247                                           | 1254                                           | C—O—C stretching of aryl-<br>alkyl ether       | Lignin                  | 5         |
| 1373                                           | 1371                                           | C—H <sub>2</sub> scissoring                    | Cellulose               | 4         |
| 1430                                           | 1430                                           | C—H <sub>2</sub> bending                       | Cellulose               | 8         |
| 1460                                           | 1460                                           | C—H <sub>3</sub> asymmetric bending            | Lignin                  | 7         |
| 1515                                           | 1511                                           | C=C stretching of the<br>aromatic ring         | Lignin                  | 3         |
| 1603                                           | 1631                                           | C=C stretching                                 | Lignin                  | 8         |
| 1735                                           | 1735                                           | C=O stretching of acetyl or<br>carboxylic acid | Hemicelluloses & lignin | 9         |
| 2900                                           | 2900                                           | C—H stretching                                 | Cellulose               | 10        |
